# Supplementary material for: Design of judicial public opinion supervision and intelligent decision-making model based on Bi-LSTM
Source: PeerJ Comput Sci. 2024 Nov 13;10:e2385. doi: 10.7717/peerj-cs.2385 (PMC11623130; doi:10.7717/peerj-cs.2385)
Supplement: Supplemental Information 2 [file peerj-cs-10-2385-s002.xlsx]

## Sheet: Sheet1
Code comments in both Chinese and English
自定义分字	Custom Typing
#娄底那种一句话超过max_seq_length的且没有句号的，用分割，再长的不考虑了。。。	#If a sentence exceeds the max_deq_1ength and does not have a period, use segmentation, and do not consider longer sentences...
# 判断这一句是否超过最大长度	#Determine if this sentence exceeds the maximum length
# 首先将源文件改名为新文件名，避免覆盖	#First, rename the source file to a new file name to avoid overwriting
如果想训练，那么直接 指定参数跑，如果想启动服务，那么注释掉train,打开server即可	If you want to train, simply specify the parameters to run. If you want to start the service, comment out the train and open the server
# 加载label->id的词典	#Load the dictionary for label ->id
#todo: 组合策略	#Todo: Combination Strategy
将id形式的结果转化为真实序列结果	Convert the result in ID form into a real sequence result
组合策略	Combination strategy
"""
将一个样本进行分析，然后将字转化为id, 标签转化为id,然后结构化到InputFeatures对象中	Analyze a sample, then convert words into IDs, labels into IDs, and structure them into InputFeatures objects
:param ex_index: index
:param example: 一个样本	: param example: a sample
:param label_list: 标签列表	: paramlabel-list: label list
:param max_seq_length:
:param tokenizer:
:param mode:
:return:
"""
# 1表示从1开始对label进行index化	#1 means to index the label starting from 1
# 保存label->index 的map	#Save the map of label ->index
# 序列截断	#Sequence truncation
# -2 的原因是因为序列需要加一个句首和句尾标志	#The reason for -2 is that the sequence needs to add a sentence beginning and ending marker
# 句子开始设置CLS 标志	#Set CLS flag at the beginning of the sentence
# O OR CLS 没有任何影响，不过我觉得O 会减少标签个数,不过拒收和句尾使用不同的标志来标注，使用LCS 也没毛病	#O OR CLS has no impact, but I think O will reduce the number of labels. However, rejecting and using different flags at the end of the sentence can also be done with LCS
# 句尾添加[SEP] 标志	#Add the [SEP] flag at the end of the sentence
# 结构化为一个类	#Structured as a class
# 先获取标注结果	#First, obtain the annotation results
将模型标注序列和输入序列结合 转化为结果	Combine the model annotation sequence with the input sequence to convert it into a result
"在读取数据的时候，自动获取类别个数"	Automatically retrieve the number of categories when reading data
将一个训练样本转化为InputFeature，其中进行字符seg并且index化,和label的index转化	Convert a training sample into an InputFeature, where the character seg is processed and indexed, and the label is indexed
# 1. 构建label->id的映射	# 1. Build a mapping of label ->id
# 截断，因为有句首和句尾的标识符	#Truncate because there are identifiers at the beginning and end of the sentence
#将字符转化为id形式	#Convert characters into ID format
#补全到max_seg_length	#Complete to max_ded_length
将训练文件转化特征后，存储为tf_record格式，用于模型的读取	After converting the training file into features, store it in tf_decord format for model reading
# 将每一个样本转化为idx特征，封装到map中后进行序列化存储为record	#Convert each sample into an IDX feature, encapsulate it in a map, and serialize and store it as a record
# 转化为Example 协议内存块	#Convert to Example Protocol Memory Block
# 解析一个record中的数据	#Analyze data in a record
模型输入函数	Model input function
# 通过传入的训练数据，进行representation	#Perform representation based on the incoming training data
# 打印变量名称	#Print variable names
#定义分词器	#Define tokenizer
# estimator 运行参数	#Estimation running parameters
# params是一个dict 里面的key是model_fn 里面用到的参数名称，value是对应的数据	#Params is a key in a dict, which is the parameter name used in model_fn, and value is the corresponding data
